# Supplementary material
Source: MDPI journal article supplement (https://www.mdpi.com/2673-7256/2/1/7)
Supplement: s1 [file s1]

## Supplementary Information

# Effect of Photolysis on Zirconium Amino Phenoxides for the Hydrophosphination of Alkenes: Improving Catalysis

Bryan T. Novas<sup>1</sup>, Jacob A. Morris<sup>1</sup>, Matthew D. Liptak<sup>1</sup> and Rory Waterman<sup>1,\*</sup>

<sup>1</sup> Department of Chemistry, University of Vermont, 82 University Place, Burlington, VT 05401, USA; Bryan.Novas@uvm.edu (B.T.N.); Jacob.Morris@uvm.edu (J.A.M.); Matthew.Liptak@uvm.edu (M.D.L.)

\* Correspondence: Rory.Waterman@uvm.edu

## Content

### Computational Details (p. S3-S5)

**Figure S1.** Electronic transitions for compounds **A** (red), **B** (yellow), and **AB** (blue) calculated using TD-DFT at the B3LYP/def2-TZVP level of theory.

**Figure S2.** Molecular orbital transitions for compound **A**.

**Figure S3.** Electronic transitions from MO 173 → 174 in compound **A**.

**Figure S4.** Molecular orbital transitions for compound **B**.

**Figure S5.** Molecular orbital transitions for compound **AB**.

### Cartesian Coordinates (p. S6-S24)

### Spectra of Hydrophosphination Reactions (p. S25-S38)

**Figure S6.** <sup>1</sup>NMR spectrum of the hydrophosphination of styrene with Ph<sub>2</sub>PH and **1** in C<sub>6</sub>D<sub>6</sub> after 2 hours under LED irradiation.

**Figure S7.** <sup>1</sup>NMR spectrum of the hydrophosphination of 4-*tert*-butylstyrene with Ph<sub>2</sub>PH and **1** in C<sub>6</sub>D<sub>6</sub> after 2 hours under LED irradiation.

**Figure S8.** <sup>1</sup>NMR spectrum of the hydrophosphination of 4-bromostyrene with Ph<sub>2</sub>PH and **1** in C<sub>6</sub>D<sub>6</sub> after 2 hours under LED irradiation.

**Figure S9.** <sup>1</sup>NMR spectrum of the hydrophosphination of 2,3-dimethylbutadiene with Ph<sub>2</sub>PH and **1** in C<sub>6</sub>D<sub>6</sub> after 2 hours under LED irradiation.

**Figure S10.** <sup>1</sup>NMR spectrum of the hydrophosphination of methyl acrylate with Ph<sub>2</sub>PH and **1** in C<sub>6</sub>D<sub>6</sub> after 2 hours under LED irradiation.

**Figure S11.** <sup>1</sup>NMR spectrum of the hydrophosphination of *trans*-chalcone with Ph<sub>2</sub>PH and **1** in C<sub>6</sub>D<sub>6</sub> after 24 hours under LED irradiation.

**Figure S12.** <sup>1</sup>NMR spectrum of the hydrophosphination of styrene with PhPH<sub>2</sub> and **1** in C<sub>6</sub>D<sub>6</sub> after 2 hours under LED irradiation.

**Figure S13.**  $^1\text{NMR}$  spectrum of the hydrophosphination of styrene with  $\text{Ph}_2\text{PH}$  and **2** in  $\text{C}_6\text{D}_6$  after 2 hours under LED irradiation.

**Figure S14.**  $^1\text{NMR}$  spectrum of the hydrophosphination of 4-*tert*-butylstyrene with  $\text{Ph}_2\text{PH}$  and **2** in  $\text{C}_6\text{D}_6$  after 2 hours under LED irradiation.

**Figure S15.**  $^1\text{NMR}$  spectrum of the hydrophosphination of 4-bromostyrene with  $\text{Ph}_2\text{PH}$  and **2** in  $\text{C}_6\text{D}_6$  after 2 hours under LED irradiation.

**Figure S16.**  $^1\text{NMR}$  spectrum of the hydrophosphination of 2,3-dimethylbutadiene with  $\text{Ph}_2\text{PH}$  and **2** in  $\text{C}_6\text{D}_6$  after 2 hours under LED irradiation.

**Figure S117.**  $^1\text{NMR}$  spectrum of the hydrophosphination of methyl acrylate with  $\text{Ph}_2\text{PH}$  and **2** in  $\text{C}_6\text{D}_6$  after 2 hours under LED irradiation.

**Figure S118.**  $^1\text{NMR}$  spectrum of the hydrophosphination of *trans*-chalcone with  $\text{Ph}_2\text{PH}$  and **2** in  $\text{C}_6\text{D}_6$  after 24 hours under LED irradiation.

**Figure S119.**  $^1\text{NMR}$  spectrum of the hydrophosphination of styrene with  $\text{PhPH}_2$  and **2** in  $\text{C}_6\text{D}_6$  after 2 hours under LED irradiation.

## References (p. S39)

## Computational Details

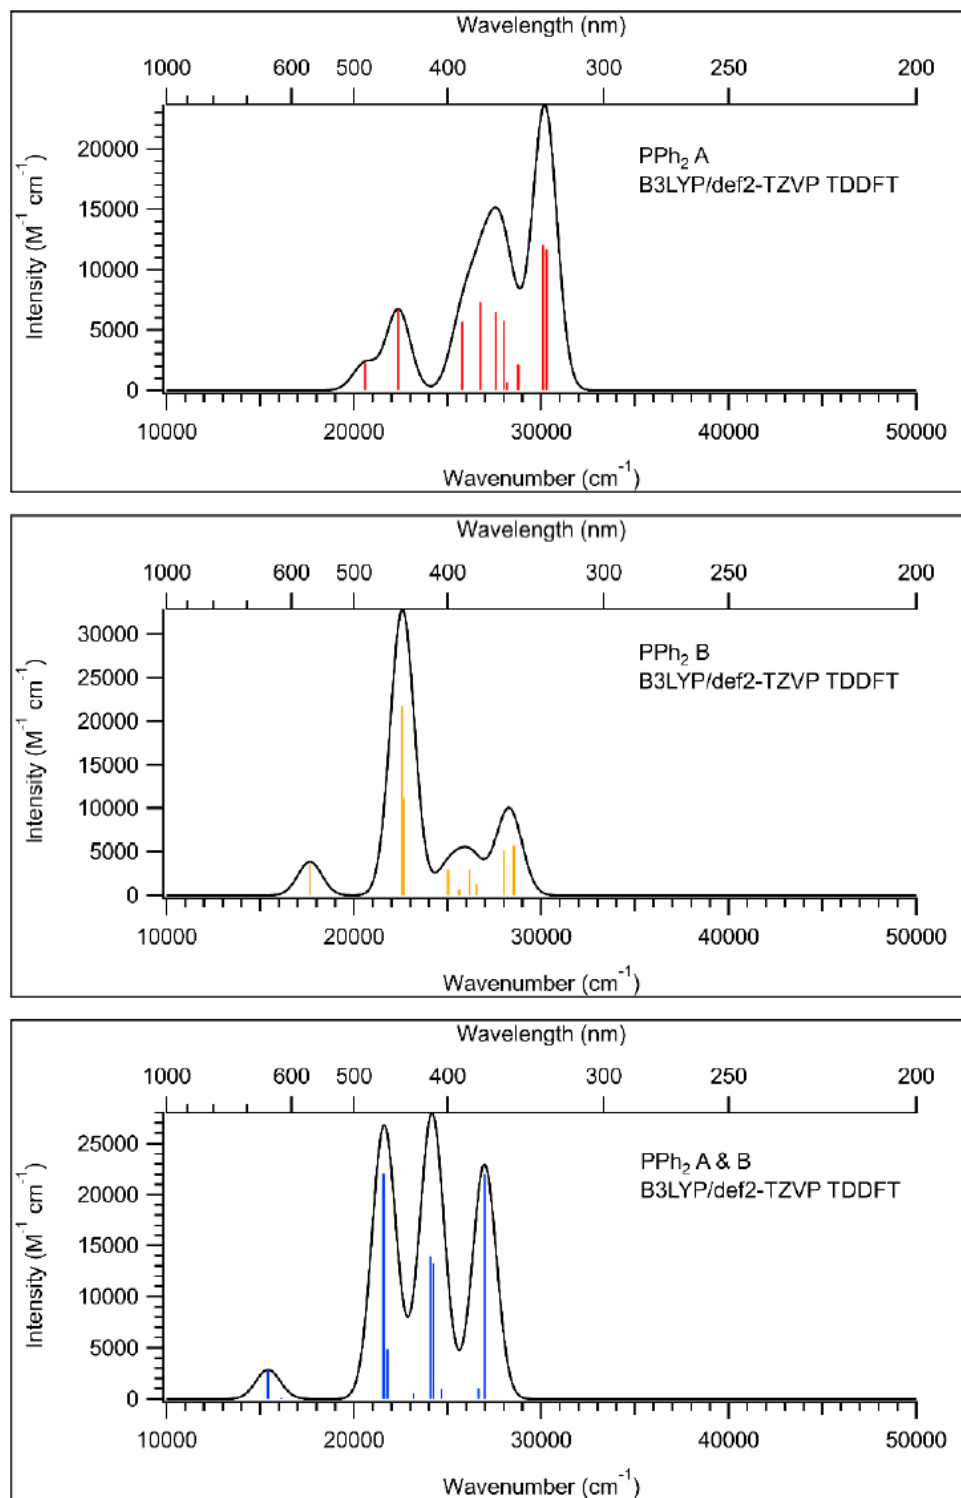

**Figure S1.** Electronic transitions for compounds **A** (red), **B** (yellow), and **AB** (blue) calculated using TD-DFT at the B3LYP/def2-TZVP level of theory.

**Compound A:**

| Excited State | Transition (MO#-->MO#) | Contribution (rounded) |
|---------------|------------------------|------------------------|
| 1             | 173→174                | 90%                    |
|               | 173→175                | 1%                     |
|               | 173→176                | 5%                     |
| 2             | 173→175                | 91%                    |
|               | 172→174                | 1%                     |
|               | 173→176                | 3%                     |
| 3             | 173→176                | 62%                    |
|               | 172→175                | 10%                    |
|               | 172→174                | 9%                     |
|               | 173→177                | 8%                     |
|               | 173→180                | 1%                     |
| 4             | 172→174                | 36%                    |
|               | 172→175                | 30%                    |
|               | 173→176                | 16%                    |

**Figure S2.** Molecular orbital transitions for compound A.

Compound A MO 173 → 174

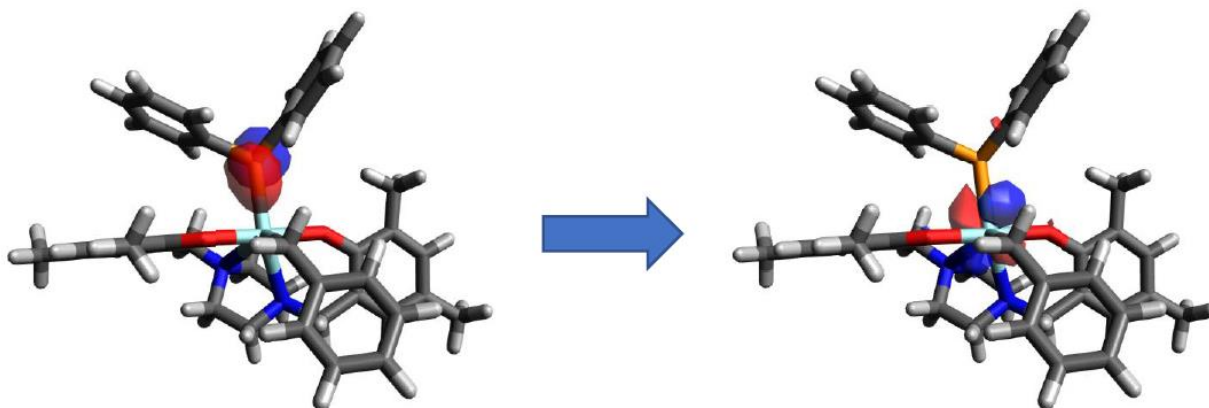

**Figure S3.** Electronic transitions from MO 173 → 174 in compound A. This is a visual example of a P 3*p* → Zr 4*d* transition.

**Compound B:**

| Excited State | Transition (MO#-->MO#) | Contribution |
|---------------|------------------------|--------------|
| 1             | 173→174                | 86%          |
|               | 173→175                | 11%          |
| 2             | 173→175                | 62%          |
|               | 172→176                | 22%          |
|               | 173→174                | 6%           |
|               | 172→174                | 5%           |
| 3             | 173→176                | 74%          |
|               | 173→175                | 16%          |
|               | 173→174                | 4%           |
|               | 172→174                | 2%           |
| 4             | 173→177                | 84%          |
|               | 172→174                | 10%          |
|               | 171→174                | 1%           |

**Figure S4.** Molecular orbital transitions for compound **B**.**Compound AB:**

| Excited State | Transition (MO#-->MO#) | Contribution |
|---------------|------------------------|--------------|
| 1             | 197→198                | 86%          |
|               | 197→200                | 6%           |
|               | 196→198                | 3%           |
|               | 197→199                | 3%           |
| 2             | 197→199                | 95%          |
|               | 197→198                | 3%           |
| 3             | 196→199                | 83%          |
|               | 197→200                | 12%          |
| 4             | 197→200                | 77%          |
|               | 196→199                | 13%          |
|               | 197→198                | 5%           |
|               | 196→200                | 1%           |
| 5             | 196→198                | 33%          |
|               | 197→201                | 31%          |
|               | 196→200                | 26%          |
|               | 196→201                | 2%           |
|               | 197→198                | 2%           |

**Figure S5.** Molecular orbital transitions for compound **AB**.

## Cartesian Coordinates

B3LYP/def2-TZVP geometry optimized Cartesian coordinates for compound **2**.

|    |           |           |           |
|----|-----------|-----------|-----------|
| Zr | 1.712500  | 22.381900 | 9.017200  |
| N  | -0.337600 | 21.307500 | 9.606300  |
| O  | 1.850300  | 20.444200 | 8.375200  |
| C  | -1.177700 | 21.191200 | 8.382400  |
| H  | -2.114200 | 21.119500 | 8.625200  |
| H  | -0.930200 | 20.397300 | 7.882200  |
| C  | -0.944200 | 22.438600 | 7.540800  |
| H  | -0.349000 | 22.241600 | 6.801400  |
| H  | -1.784300 | 22.763900 | 7.181300  |
| C  | 1.421300  | 19.170800 | 8.535100  |
| C  | 1.970800  | 18.126300 | 7.787200  |
| C  | 1.491100  | 16.846100 | 8.032500  |
| H  | 1.859200  | 16.141800 | 7.548000  |
| C  | 0.492400  | 16.550700 | 8.963100  |
| C  | -0.044400 | 17.622000 | 9.643600  |
| H  | -0.734800 | 17.466800 | 10.248300 |
| C  | 0.404800  | 18.923100 | 9.462000  |
| C  | -0.215700 | 19.994500 | 10.298800 |
| H  | -1.099000 | 19.702000 | 10.574100 |
| H  | 0.318500  | 20.113800 | 11.100700 |
| C  | 3.024100  | 18.391900 | 6.688300  |
| C  | 2.398500  | 19.275300 | 5.615900  |
| H  | 1.626900  | 18.839600 | 5.248000  |
| H  | 3.038100  | 19.436400 | 4.917400  |
| H  | 2.134500  | 20.113800 | 6.005400  |
| C  | 4.278000  | 19.045500 | 7.285900  |

|   |           |           |           |
|---|-----------|-----------|-----------|
| H | 4.907400  | 19.230500 | 6.586100  |
| H | 4.675200  | 18.448600 | 7.925500  |
| H | 4.033000  | 19.866200 | 7.722300  |
| C | 3.483500  | 17.102700 | 5.998200  |
| H | 2.731000  | 16.679000 | 5.581000  |
| H | 3.865500  | 16.511900 | 6.649900  |
| H | 4.140900  | 17.314600 | 5.332200  |
| C | 0.048200  | 15.103300 | 9.198700  |
| C | 1.224600  | 14.315400 | 9.786600  |
| H | 1.949300  | 14.303500 | 9.155400  |
| H | 0.948000  | 13.414200 | 9.971800  |
| H | 1.516500  | 14.736200 | 10.599400 |
| C | -0.392100 | 14.461700 | 7.907500  |
| H | -1.148500 | 14.939200 | 7.556400  |
| H | -0.635800 | 13.548500 | 8.069800  |
| H | 0.328700  | 14.494500 | 7.272700  |
| C | -1.102800 | 15.031700 | 10.202600 |
| H | -0.828700 | 15.428600 | 11.032200 |
| H | -1.340100 | 14.112500 | 10.351700 |
| H | -1.860400 | 15.506200 | 9.855200  |
| C | 3.047000  | 21.886500 | 10.789400 |
| H | 3.913800  | 21.644800 | 10.427500 |
| H | 3.172600  | 22.713100 | 11.282300 |
| C | 2.691700  | 20.845000 | 11.783600 |
| C | 2.982300  | 19.484200 | 11.586500 |
| H | 3.448000  | 19.218600 | 10.826600 |
| C | 2.580000  | 18.529200 | 12.514600 |
| H | 2.771600  | 17.628000 | 12.377600 |

|   |           |           |           |
|---|-----------|-----------|-----------|
| C | 1.899800  | 18.929100 | 13.625600 |
| H | 1.644700  | 18.284500 | 14.247100 |
| C | 1.571100  | 20.251100 | 13.868400 |
| H | 1.087600  | 20.504800 | 14.622300 |
| C | 2.000000  | 21.185200 | 12.925800 |
| H | 1.810900  | 22.083400 | 13.076100 |
| N | -0.337600 | 23.456200 | 8.428100  |
| O | 1.850300  | 24.319500 | 9.659200  |
| C | -1.177700 | 23.572600 | 9.652000  |
| H | -2.114200 | 23.644200 | 9.409100  |
| H | -0.930200 | 24.366400 | 10.152100 |
| C | -0.944200 | 22.325200 | 10.493600 |
| H | -0.349000 | 22.522100 | 11.233000 |
| H | -1.784300 | 21.999900 | 10.853100 |
| C | 1.421300  | 25.592900 | 9.499300  |
| C | 1.970800  | 26.637400 | 10.247100 |
| C | 1.491100  | 27.917700 | 10.001900 |
| H | 1.859200  | 28.621900 | 10.486400 |
| C | 0.492400  | 28.213100 | 9.071300  |
| C | -0.044400 | 27.141800 | 8.390800  |
| H | -0.734800 | 27.296900 | 7.786000  |
| C | 0.404800  | 25.840600 | 8.572300  |
| C | -0.215700 | 24.769300 | 7.735500  |
| H | -1.099000 | 25.061700 | 7.460200  |
| H | 0.318500  | 24.649900 | 6.933600  |
| C | 3.024100  | 26.371800 | 11.346000 |
| C | 2.398500  | 25.488500 | 12.418500 |
| H | 1.626900  | 25.924200 | 12.786400 |



|   |           |           |           |
|---|-----------|-----------|-----------|
| H | 3.038100  | 25.327300 | 13.117000 |
| H | 2.134500  | 24.649900 | 12.028900 |
| C | 4.278000  | 25.718300 | 10.748500 |
| H | 4.907400  | 25.533200 | 11.448200 |
| H | 4.675200  | 26.315100 | 10.108900 |
| H | 4.033000  | 24.897600 | 10.312000 |
| C | 3.483500  | 27.661000 | 12.036100 |
| H | 2.731000  | 28.084800 | 12.453300 |
| H | 3.865500  | 28.251900 | 11.384500 |
| H | 4.140900  | 27.449100 | 12.702200 |
| C | 0.048200  | 29.660500 | 8.835600  |
| C | 1.224600  | 30.448300 | 8.247700  |
| H | 1.949300  | 30.460200 | 8.878900  |
| H | 0.948000  | 31.349500 | 8.062600  |
| H | 1.516500  | 30.027500 | 7.435000  |
| C | -0.392100 | 30.302100 | 10.126900 |
| H | -1.148500 | 29.824600 | 10.478000 |
| H | -0.635800 | 31.215300 | 9.964600  |
| H | 0.328700  | 30.269200 | 10.761700 |
| C | -1.102800 | 29.732100 | 7.831700  |
| H | -0.828700 | 29.335200 | 7.002100  |
| H | -1.340100 | 30.651200 | 7.682600  |
| H | -1.860400 | 29.257600 | 8.179200  |
| C | 3.047000  | 22.877300 | 7.245000  |
| H | 3.913800  | 23.119000 | 7.606900  |
| H | 3.172600  | 22.050600 | 6.752100  |
| C | 2.691700  | 23.918800 | 6.250700  |
| C | 2.982300  | 25.279600 | 6.447900  |

|   |          |           |          |
|---|----------|-----------|----------|
| H | 3.448000 | 25.545200 | 7.207700 |
| C | 2.580000 | 26.234500 | 5.519700 |
| H | 2.771600 | 27.135800 | 5.656800 |
| C | 1.899800 | 25.834700 | 4.408800 |
| H | 1.644700 | 26.479300 | 3.787200 |
| C | 1.571100 | 24.512600 | 4.165900 |
| H | 1.087600 | 24.259000 | 3.412100 |
| C | 2.000000 | 23.578600 | 5.108500 |
| H | 1.810900 | 22.680300 | 4.958200 |

B3LYP/def2-TZVP geometry optimized Cartesian coordinates for compound **A**.

|    |           |           |           |
|----|-----------|-----------|-----------|
| Zr | 1.839158  | 22.448103 | 8.852881  |
| N  | -0.265872 | 21.327092 | 9.606617  |
| O  | 1.899026  | 20.494111 | 8.207482  |
| C  | -1.186538 | 21.204953 | 8.456988  |
| H  | -2.211377 | 20.999796 | 8.820855  |
| H  | -0.875367 | 20.348570 | 7.846898  |
| C  | -1.122157 | 22.517729 | 7.651929  |
| H  | -0.589437 | 22.387993 | 6.697760  |
| H  | -2.136710 | 22.891415 | 7.415911  |
| C  | 1.472597  | 19.227612 | 8.359317  |
| C  | 1.944539  | 18.160540 | 7.535183  |
| C  | 1.455533  | 16.877307 | 7.797685  |
| H  | 1.820370  | 16.057194 | 7.181032  |
| C  | 0.519448  | 16.573886 | 8.799951  |
| C  | 0.047328  | 17.643388 | 9.559157  |
| H  | -0.692308 | 17.479241 | 10.345624 |
| C  | 0.509723  | 18.948436 | 9.357885  |
| C  | -0.005566 | 20.031201 | 10.269502 |

|   |           |           |           |
|---|-----------|-----------|-----------|
| H | -0.935685 | 19.674084 | 10.754422 |
| H | 0.717283  | 20.233768 | 11.078118 |
| C | 2.947101  | 18.396887 | 6.391077  |
| C | 2.327089  | 19.367201 | 5.362392  |
| H | 1.429860  | 18.923086 | 4.904797  |
| H | 3.049314  | 19.581905 | 4.559605  |
| H | 2.043746  | 20.314773 | 5.833703  |
| C | 4.264088  | 18.982005 | 6.946506  |
| H | 4.969025  | 19.175934 | 6.123051  |
| H | 4.737144  | 18.272554 | 7.642192  |
| H | 4.088323  | 19.921022 | 7.482480  |
| C | 3.304075  | 17.103337 | 5.638635  |
| H | 2.421466  | 16.631348 | 5.182179  |
| H | 3.795419  | 16.365364 | 6.290151  |
| H | 4.005850  | 17.346563 | 4.827316  |
| C | 0.070406  | 15.122263 | 9.020587  |
| C | 1.294651  | 14.264576 | 9.410961  |
| H | 2.062432  | 14.270385 | 8.623718  |
| H | 0.994022  | 13.219008 | 9.580169  |
| H | 1.756665  | 14.646422 | 10.333000 |
| C | -0.548649 | 14.560838 | 7.722083  |
| H | -1.435067 | 15.141089 | 7.425951  |
| H | -0.855290 | 13.513374 | 7.865910  |
| H | 0.165807  | 14.588643 | 6.886823  |
| C | -0.972402 | 15.001732 | 10.142306 |
| H | -0.570472 | 15.339319 | 11.109204 |
| H | -1.272653 | 13.950123 | 10.257926 |
| H | -1.880441 | 15.583353 | 9.923401  |

|   |           |           |           |
|---|-----------|-----------|-----------|
| P | 3.160375  | 21.910229 | 11.136140 |
| N | -0.385828 | 23.508930 | 8.458259  |
| O | 2.001121  | 24.422041 | 9.369205  |
| C | -1.049393 | 23.628880 | 9.776044  |
| H | -2.127700 | 23.830020 | 9.630133  |
| H | -0.618912 | 24.487492 | 10.304308 |
| C | -0.815673 | 22.316649 | 10.551927 |
| H | -0.082124 | 22.453621 | 11.361633 |
| H | -1.756099 | 21.944489 | 11.002416 |
| C | 1.529951  | 25.682746 | 9.291070  |
| C | 2.154643  | 26.786324 | 9.947256  |
| C | 1.561631  | 28.045437 | 9.796615  |
| H | 2.038291  | 28.890594 | 10.292014 |
| C | 0.392844  | 28.293661 | 9.059025  |
| C | -0.196727 | 27.193539 | 8.438952  |
| H | -1.105606 | 27.312377 | 7.846463  |
| C | 0.356373  | 25.912236 | 8.534066  |
| C | -0.294937 | 24.806542 | 7.747230  |
| H | -1.313794 | 25.127353 | 7.457187  |
| H | 0.261972  | 24.616237 | 6.813655  |
| C | 3.426414  | 26.624133 | 10.795626 |
| C | 3.129754  | 25.696727 | 11.993115 |
| H | 2.344923  | 26.135613 | 12.629133 |
| H | 4.035525  | 25.574395 | 12.607060 |
| H | 2.802793  | 24.698838 | 11.677860 |
| C | 4.570412  | 26.054335 | 9.929563  |
| H | 5.476047  | 25.919612 | 10.540006 |
| H | 4.811163  | 26.749881 | 9.110787  |

|   |           |           |           |
|---|-----------|-----------|-----------|
| H | 4.309902  | 25.083814 | 9.497016  |
| C | 3.925021  | 27.961176 | 11.373724 |
| H | 3.190515  | 28.422201 | 12.051766 |
| H | 4.180016  | 28.686896 | 10.586944 |
| H | 4.837484  | 27.773032 | 11.958587 |
| C | -0.180241 | 29.715880 | 8.971351  |
| C | 0.882889  | 30.667660 | 8.381787  |
| H | 1.788137  | 30.700138 | 9.003731  |
| H | 0.484218  | 31.691450 | 8.312872  |
| H | 1.179883  | 30.346793 | 7.372699  |
| C | -0.568995 | 30.203533 | 10.384414 |
| H | -1.330168 | 29.545888 | 10.829364 |
| H | -0.980391 | 31.224108 | 10.339344 |
| H | 0.298851  | 30.220424 | 11.058537 |
| C | -1.429954 | 29.784868 | 8.079303  |
| H | -1.212863 | 29.471725 | 7.047275  |
| H | -1.800281 | 30.820057 | 8.042349  |
| H | -2.245529 | 29.156600 | 8.467264  |
| C | 3.047004  | 22.942461 | 6.950814  |
| H | 3.923012  | 23.398213 | 7.449378  |
| H | 3.333907  | 21.965219 | 6.539382  |
| C | 2.493828  | 23.839333 | 5.916259  |
| C | 2.714182  | 25.234057 | 5.942667  |
| H | 3.345914  | 25.653983 | 6.728494  |
| C | 2.139203  | 26.081262 | 4.995928  |
| H | 2.332307  | 27.155014 | 5.050058  |
| C | 1.323999  | 25.568086 | 3.981930  |
| H | 0.875070  | 26.231432 | 3.241077  |

|   |          |           |           |
|---|----------|-----------|-----------|
| C | 1.106379 | 24.187953 | 3.924295  |
| H | 0.488735 | 23.765323 | 3.128105  |
| C | 1.681959 | 23.339940 | 4.871146  |
| H | 1.512473 | 22.262040 | 4.798067  |
| C | 4.933875 | 22.419871 | 10.971917 |
| C | 5.589044 | 22.911905 | 12.115681 |
| H | 5.029894 | 22.993289 | 13.050131 |
| C | 6.931190 | 23.292893 | 12.070936 |
| H | 7.417521 | 23.668965 | 12.973471 |
| C | 7.648773 | 23.199179 | 10.875343 |
| H | 8.696394 | 23.502729 | 10.837341 |
| C | 7.015957 | 22.713061 | 9.729829  |
| H | 7.567746 | 22.630529 | 8.790858  |
| C | 5.674086 | 22.325058 | 9.780482  |
| H | 5.202365 | 21.933926 | 8.876706  |
| C | 3.364488 | 20.118793 | 11.549898 |
| C | 4.233624 | 19.247104 | 10.870596 |
| H | 4.822647 | 19.620135 | 10.031891 |
| C | 4.358056 | 17.912092 | 11.255072 |
| H | 5.039657 | 17.255131 | 10.710359 |
| C | 3.610607 | 17.411149 | 12.325192 |
| H | 3.709227 | 16.365817 | 12.623467 |
| C | 2.748034 | 18.263174 | 13.016655 |
| H | 2.175477 | 17.890410 | 13.868765 |
| C | 2.635344 | 19.603787 | 12.638359 |
| H | 1.992053 | 20.276351 | 13.211587 |

B3LYP/def2-TZVP geometry optimized Cartesian coordinates for compound **B**.

|    |          |           |          |
|----|----------|-----------|----------|
| Zr | 1.763930 | 22.189712 | 9.084369 |
|----|----------|-----------|----------|

|   |           |           |           |
|---|-----------|-----------|-----------|
| N | -0.421960 | 21.150019 | 9.800429  |
| O | 1.791954  | 20.206385 | 8.577105  |
| C | -1.267090 | 20.945521 | 8.600798  |
| H | -2.315522 | 20.777807 | 8.913339  |
| H | -0.929889 | 20.040802 | 8.083191  |
| C | -1.136607 | 22.187300 | 7.698527  |
| H | -0.531240 | 21.979679 | 6.802750  |
| H | -2.129240 | 22.535187 | 7.352247  |
| C | 1.292198  | 18.962267 | 8.738486  |
| C | 1.714755  | 17.853355 | 7.944459  |
| C | 1.127548  | 16.609871 | 8.204559  |
| H | 1.451751  | 15.763227 | 7.601382  |
| C | 0.151278  | 16.381098 | 9.187524  |
| C | -0.258031 | 17.489335 | 9.927664  |
| H | -1.025035 | 17.389607 | 10.698491 |
| C | 0.291237  | 18.758668 | 9.718286  |
| C | -0.210348 | 19.899496 | 10.563975 |
| H | -1.162800 | 19.595420 | 11.041374 |
| H | 0.498707  | 20.134807 | 11.374548 |
| C | 2.790279  | 17.992798 | 6.855575  |
| C | 2.369812  | 19.067461 | 5.830954  |
| H | 1.403420  | 18.804893 | 5.371132  |
| H | 3.120445  | 19.139285 | 5.029155  |
| H | 2.283554  | 20.051622 | 6.305497  |
| C | 4.128175  | 18.379279 | 7.519769  |
| H | 4.899498  | 18.563950 | 6.757783  |
| H | 4.476460  | 17.567377 | 8.176619  |
| H | 4.025198  | 19.290921 | 8.117323  |

|   |           |           |           |
|---|-----------|-----------|-----------|
| C | 3.018405  | 16.686222 | 6.076224  |
| H | 2.107036  | 16.342712 | 5.563464  |
| H | 3.381389  | 15.872739 | 6.722570  |
| H | 3.785721  | 16.861783 | 5.308302  |
| C | -0.434942 | 14.975584 | 9.384343  |
| C | 0.701633  | 13.963442 | 9.641051  |
| H | 1.405027  | 13.916297 | 8.797918  |
| H | 0.287337  | 12.954193 | 9.786986  |
| H | 1.274072  | 14.232947 | 10.541206 |
| C | -1.203818 | 14.562268 | 8.109664  |
| H | -2.035373 | 15.255377 | 7.915738  |
| H | -1.619600 | 13.548557 | 8.220032  |
| H | -0.550993 | 14.564872 | 7.224904  |
| C | -1.406196 | 14.913613 | 10.573140 |
| H | -0.918422 | 15.207210 | 11.514490 |
| H | -1.775169 | 13.884972 | 10.695559 |
| H | -2.282339 | 15.561762 | 10.422055 |
| C | 3.094717  | 21.763469 | 10.885543 |
| H | 3.915194  | 21.381589 | 10.239516 |
| H | 3.371702  | 22.767099 | 11.238267 |
| C | 2.815243  | 20.839298 | 12.002645 |
| C | 3.091631  | 19.458128 | 11.919257 |
| H | 3.556116  | 19.063719 | 11.012894 |
| C | 2.779236  | 18.590545 | 12.965820 |
| H | 3.008211  | 17.527309 | 12.867270 |
| C | 2.180924  | 19.070989 | 14.134924 |
| H | 1.938716  | 18.391275 | 14.953440 |
| C | 1.909052  | 20.438093 | 14.243391 |



|   |           |           |           |
|---|-----------|-----------|-----------|
| H | 1.456017  | 20.834800 | 15.154802 |
| C | 2.222748  | 21.306392 | 13.197356 |
| H | 2.016661  | 22.375091 | 13.305229 |
| N | -0.460998 | 23.233992 | 8.480454  |
| O | 1.742233  | 24.168310 | 9.642359  |
| C | -1.222142 | 23.444959 | 9.733186  |
| H | -2.287663 | 23.622565 | 9.492277  |
| H | -0.839876 | 24.344977 | 10.226407 |
| C | -1.042912 | 22.199014 | 10.623831 |
| H | -0.384688 | 22.400274 | 11.482102 |
| H | -2.015462 | 21.853823 | 11.025610 |
| C | 1.311034  | 25.421280 | 9.431580  |
| C | 1.843308  | 26.539432 | 10.141790 |
| C | 1.336679  | 27.803360 | 9.824246  |
| H | 1.742039  | 28.661877 | 10.357612 |
| C | 0.333584  | 28.040182 | 8.868966  |
| C | -0.189684 | 26.922635 | 8.218839  |
| H | -0.985176 | 27.033686 | 7.478903  |
| C | 0.284650  | 25.632773 | 8.480857  |
| C | -0.292997 | 24.480171 | 7.699464  |
| H | -1.272791 | 24.785829 | 7.282194  |
| H | 0.356047  | 24.227028 | 6.843599  |
| C | 2.931035  | 26.369933 | 11.216734 |
| C | 2.405783  | 25.444976 | 12.337651 |
| H | 1.537162  | 25.901800 | 12.836702 |
| H | 3.187540  | 25.284020 | 13.096607 |
| H | 2.104152  | 24.469189 | 11.940880 |
| C | 4.209662  | 25.779041 | 10.580878 |

|   |           |           |           |
|---|-----------|-----------|-----------|
| H | 4.967616  | 25.597191 | 11.358866 |
| H | 4.635105  | 26.483567 | 9.850220  |
| H | 4.011395  | 24.838138 | 10.055048 |
| C | 3.320767  | 27.704079 | 11.877150 |
| H | 2.468000  | 28.183190 | 12.381340 |
| H | 3.743547  | 28.416615 | 11.153166 |
| H | 4.091198  | 27.512202 | 12.638343 |
| C | -0.141583 | 29.474267 | 8.592248  |
| C | 1.049942  | 30.327078 | 8.104007  |
| H | 1.854655  | 30.372527 | 8.852026  |
| H | 0.725059  | 31.358666 | 7.898810  |
| H | 1.475857  | 29.910942 | 7.179350  |
| C | -0.709343 | 30.093429 | 9.889002  |
| H | -1.567843 | 29.511856 | 10.255786 |
| H | -1.044730 | 31.125832 | 9.706011  |
| H | 0.044677  | 30.122659 | 10.688738 |
| C | -1.237867 | 29.525125 | 7.517230  |
| H | -0.885620 | 29.125890 | 6.554470  |
| H | -1.545577 | 30.567473 | 7.350131  |
| H | -2.133174 | 28.960724 | 7.818257  |
| P | 3.520580  | 23.098979 | 7.240474  |
| C | 2.622810  | 23.741218 | 5.763399  |
| C | 1.917106  | 22.925485 | 4.854893  |
| H | 1.914525  | 21.842631 | 4.997024  |
| C | 1.221077  | 23.481290 | 3.778987  |
| H | 0.685596  | 22.829533 | 3.084851  |
| C | 1.201367  | 24.867500 | 3.593720  |
| H | 0.652878  | 25.301689 | 2.755610  |

|   |          |           |          |
|---|----------|-----------|----------|
| C | 1.892520 | 25.690604 | 4.485162 |
| H | 1.888430 | 26.774094 | 4.346837 |
| C | 2.602676 | 25.132906 | 5.552098 |
| H | 3.150293 | 25.779371 | 6.240762 |
| C | 4.823971 | 21.995094 | 6.594076 |
| C | 5.781917 | 21.543377 | 7.528142 |
| H | 5.665447 | 21.804211 | 8.583755 |
| C | 6.891255 | 20.801915 | 7.129368 |
| H | 7.611877 | 20.466574 | 7.878141 |
| C | 7.090286 | 20.500093 | 5.777756 |
| H | 7.963457 | 19.927371 | 5.461012 |
| C | 6.161586 | 20.953884 | 4.838217 |
| H | 6.307680 | 20.736993 | 3.777314 |
| C | 5.042393 | 21.688637 | 5.237127 |
| H | 4.340647 | 22.040080 | 4.479454 |

B3LYP/def2-TZVP geometry optimized Cartesian coordinates for compound **AB**.

|    |           |           |          |
|----|-----------|-----------|----------|
| Zr | 2.021950  | 22.381790 | 9.016790 |
| N  | -0.202450 | 21.366720 | 9.711970 |
| O  | 1.980390  | 20.387890 | 8.456780 |
| C  | -1.036300 | 21.131210 | 8.512570 |
| H  | -2.089810 | 21.039880 | 8.805460 |
| H  | -0.747340 | 20.196860 | 8.044290 |
| C  | -0.819680 | 22.313670 | 7.548690 |
| H  | -0.150340 | 22.041250 | 6.730480 |
| H  | -1.769700 | 22.638170 | 7.101870 |
| C  | 1.444600  | 19.166120 | 8.642040 |
| C  | 1.738080  | 18.057830 | 7.800400 |
| C  | 1.107410  | 16.844020 | 8.086580 |

|   |           |           |           |
|---|-----------|-----------|-----------|
| H | 1.319560  | 16.004520 | 7.443140  |
| C | 0.204810  | 16.644690 | 9.135180  |
| C | -0.083330 | 17.754690 | 9.916160  |
| H | -0.798820 | 17.686080 | 10.725480 |
| C | 0.510030  | 18.990970 | 9.682190  |
| C | 0.066540  | 20.158680 | 10.520470 |
| H | -0.836590 | 19.874160 | 11.076880 |
| H | 0.824820  | 20.430530 | 11.260610 |
| C | 2.669680  | 18.171700 | 6.576860  |
| C | 2.067970  | 19.175200 | 5.568000  |
| H | 1.106090  | 18.812390 | 5.197710  |
| H | 2.733110  | 19.292020 | 4.708730  |
| H | 1.915890  | 20.154700 | 6.017330  |
| C | 4.084250  | 18.615520 | 7.003640  |
| H | 4.743470  | 18.640570 | 6.132260  |
| H | 4.506810  | 17.906740 | 7.719360  |
| H | 4.080880  | 19.601240 | 7.462580  |
| C | 2.840790  | 16.832730 | 5.832990  |
| H | 1.896640  | 16.446540 | 5.443740  |
| H | 3.293920  | 16.067290 | 6.466510  |
| H | 3.504010  | 16.986290 | 4.979390  |
| C | -0.504270 | 15.293720 | 9.327190  |
| C | 0.489230  | 14.119120 | 9.248220  |
| H | 0.969920  | 14.043540 | 8.272220  |
| H | -0.038050 | 13.178960 | 9.430810  |
| H | 1.274160  | 14.218010 | 10.000730 |
| C | -1.562770 | 15.139560 | 8.214300  |
| H | -2.312260 | 15.931730 | 8.279400  |

|   |           |           |           |
|---|-----------|-----------|-----------|
| H | -2.078100 | 14.178560 | 8.296420  |
| H | -1.104640 | 15.195160 | 7.224860  |
| C | -1.208740 | 15.191350 | 10.690260 |
| H | -0.500030 | 15.305980 | 11.513360 |
| H | -1.677620 | 14.209800 | 10.786790 |
| H | -1.998330 | 15.935270 | 10.811290 |
| P | 3.492960  | 21.943280 | 10.725220 |
| N | -0.202510 | 23.397450 | 8.321410  |
| O | 1.980490  | 24.375600 | 9.576720  |
| C | -1.036330 | 23.632940 | 9.520840  |
| H | -2.089860 | 23.724140 | 9.227980  |
| H | -0.747470 | 24.567310 | 9.989130  |
| C | -0.819570 | 22.450520 | 10.484710 |
| H | -0.150180 | 22.723010 | 11.302840 |
| H | -1.769520 | 22.125970 | 10.931620 |
| C | 1.444870  | 25.597460 | 9.391740  |
| C | 1.738240  | 26.705440 | 10.233800 |
| C | 1.107760  | 27.919380 | 9.947870  |
| H | 1.319750  | 28.758650 | 10.591710 |
| C | 0.205420  | 28.119130 | 8.899140  |
| C | -0.082650 | 27.009440 | 8.117710  |
| H | -0.797990 | 27.078380 | 7.308280  |
| C | 0.510490  | 25.773010 | 8.351460  |
| C | 0.066730  | 24.605520 | 7.513050  |
| H | -0.836270 | 24.890360 | 6.956670  |
| H | 0.824940  | 24.333630 | 6.772890  |
| C | 2.669100  | 26.591160 | 11.457800 |
| C | 2.066410  | 25.588020 | 12.466280 |

|   |           |           |           |
|---|-----------|-----------|-----------|
| H | 1.104430  | 25.951040 | 12.835890 |
| H | 2.730930  | 25.471170 | 13.326010 |
| H | 1.914450  | 24.608500 | 12.016920 |
| C | 4.083680  | 26.146710 | 11.031890 |
| H | 4.742330  | 26.121290 | 11.903710 |
| H | 4.506890  | 26.855410 | 10.316500 |
| H | 4.080210  | 25.161060 | 10.572760 |
| C | 2.840310  | 27.930100 | 12.201730 |
| H | 1.896070  | 28.316590 | 12.590330 |
| H | 3.294070  | 28.695340 | 11.568550 |
| H | 3.502890  | 27.776340 | 13.055780 |
| C | -0.503550 | 29.470220 | 8.707630  |
| C | 0.490010  | 30.644720 | 8.787950  |
| H | 0.970170  | 30.719650 | 9.764260  |
| H | -0.037110 | 31.585040 | 8.605750  |
| H | 1.275260  | 30.546290 | 8.035640  |
| C | -1.562530 | 29.623650 | 9.820290  |
| H | -2.312060 | 28.831610 | 9.754330  |
| H | -2.077710 | 30.584710 | 9.738710  |
| H | -1.104840 | 29.567310 | 10.809870 |
| C | -1.207350 | 29.573520 | 7.344280  |
| H | -0.498370 | 29.459190 | 6.521370  |
| H | -1.675970 | 30.555160 | 7.248160  |
| H | -1.997020 | 28.829820 | 7.222520  |
| P | 3.492990  | 22.820430 | 7.308360  |
| C | 5.133440  | 22.641040 | 10.311860 |
| C | 5.957790  | 22.945740 | 11.390230 |
| H | 5.565260  | 22.895360 | 12.410900 |

|   |           |           |           |
|---|-----------|-----------|-----------|
| C | 7.281180  | 23.314660 | 11.171590 |
| H | 7.929850  | 23.554520 | 12.020160 |
| C | 7.780320  | 23.378860 | 9.874680  |
| H | 8.821690  | 23.669150 | 9.702650  |
| C | 6.955950  | 23.074200 | 8.796330  |
| H | 7.348670  | 23.124830 | 7.775800  |
| C | 5.632560  | 22.705280 | 9.014940  |
| H | 4.983830  | 22.465530 | 8.166430  |
| C | 3.639920  | 20.133620 | 10.954250 |
| C | 3.449490  | 19.119220 | 10.021500 |
| H | 2.785400  | 19.279500 | 9.166130  |
| C | 4.102970  | 17.900850 | 10.175790 |
| H | 3.953060  | 17.102580 | 9.441860  |
| C | 4.946910  | 17.696800 | 11.262700 |
| H | 5.461120  | 16.738070 | 11.384090 |
| C | 5.137280  | 18.711180 | 12.195440 |
| H | 5.801260  | 18.550580 | 13.050790 |
| C | 4.483820  | 19.929560 | 12.041190 |
| H | 4.633600  | 20.727810 | 12.775130 |
| C | 2.558660  | 23.211650 | 5.784260  |
| C | 1.233100  | 23.624650 | 5.871510  |
| H | 0.751350  | 23.716000 | 6.850250  |
| C | 0.519520  | 23.921510 | 4.714820  |
| H | -0.523590 | 24.246410 | 4.783460  |
| C | 1.131390  | 23.805460 | 3.470870  |
| H | 0.569860  | 24.039070 | 2.560690  |
| C | 2.456920  | 23.392420 | 3.383650  |
| H | 2.938360  | 23.300990 | 2.404800  |

|   |          |           |          |
|---|----------|-----------|----------|
| C | 3.170520 | 23.095560 | 4.540310 |
| H | 4.213580 | 22.770550 | 4.471720 |
| C | 4.546260 | 21.352320 | 7.018260 |
| C | 5.063220 | 20.622740 | 8.083980 |
| H | 4.503970 | 20.553310 | 9.022490 |
| C | 6.291140 | 19.981340 | 7.957140 |
| H | 6.697990 | 19.407300 | 8.795790 |
| C | 7.002130 | 20.069400 | 6.764670 |
| H | 7.968360 | 19.564680 | 6.664890 |
| C | 6.485170 | 20.799020 | 5.699010 |
| H | 7.044690 | 20.868420 | 4.760700 |
| C | 5.257260 | 21.440420 | 5.825800 |
| H | 4.850430 | 22.014550 | 4.987260 |



## Spectra of Hydrophosphination Reactions

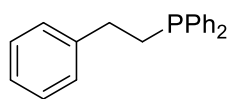

Phenethyl(diphenyl)phosphine

Spectra are consistent with literature [1]. After 2 hours under irradiation from an LED lamp the reaction goes to 83% consumption of styrene with **1** measured by  $^1\text{H}$  NMR spectroscopy.

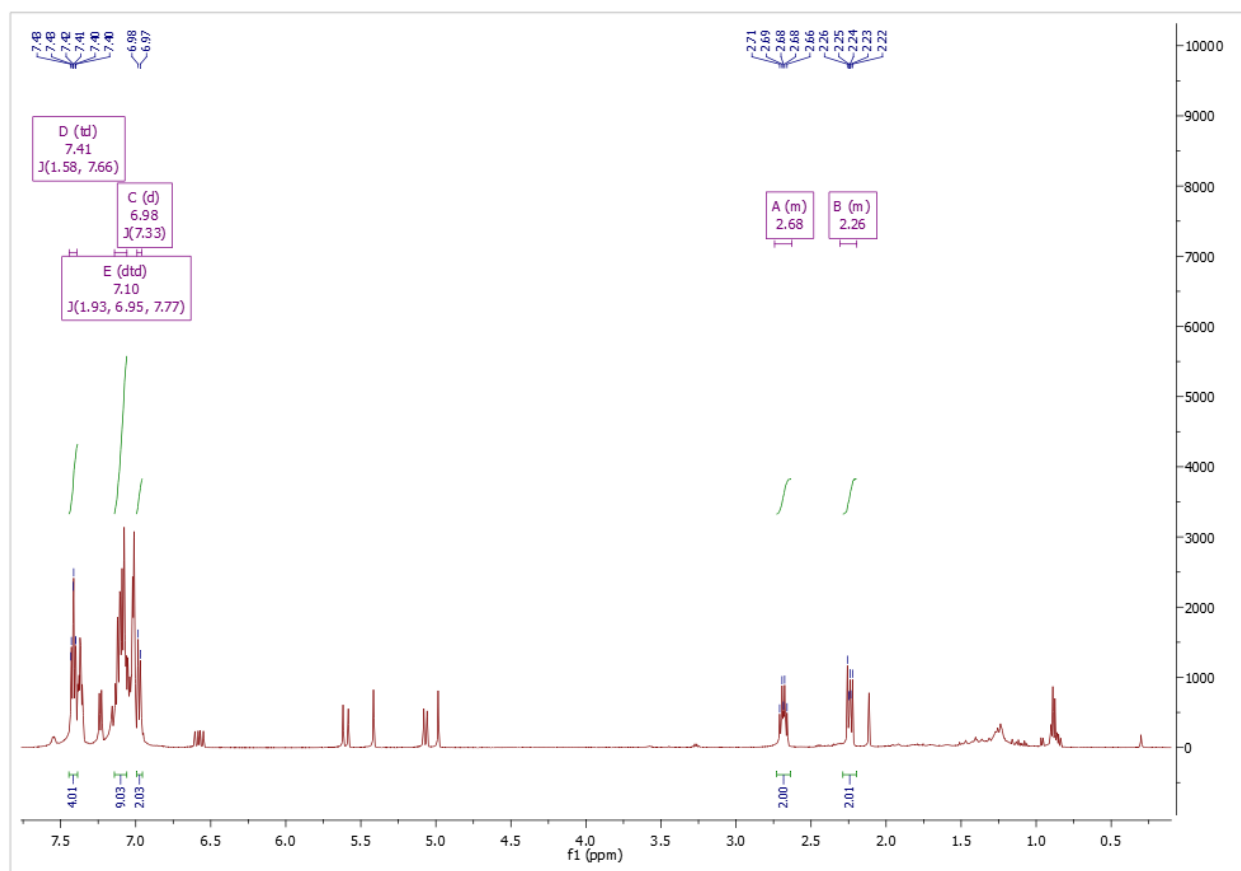

**Figure S6.**  $^1\text{H}$  NMR spectrum of the hydrophosphination of styrene with  $\text{Ph}_2\text{PH}$  and **1** in  $\text{C}_6\text{D}_6$  after 2 hours under LED irradiation.

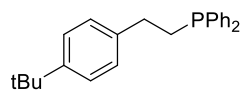

(p-(*tert*-butyl)phenethyl)(diphenyl)phosphine

Spectra are consistent with literature [2]. After 2 hours under irradiation from an LED lamp the reaction goes to 70% consumption of 4-*tert*-butylstyrene with **1** measured by  $^1\text{H}$  NMR spectroscopy.

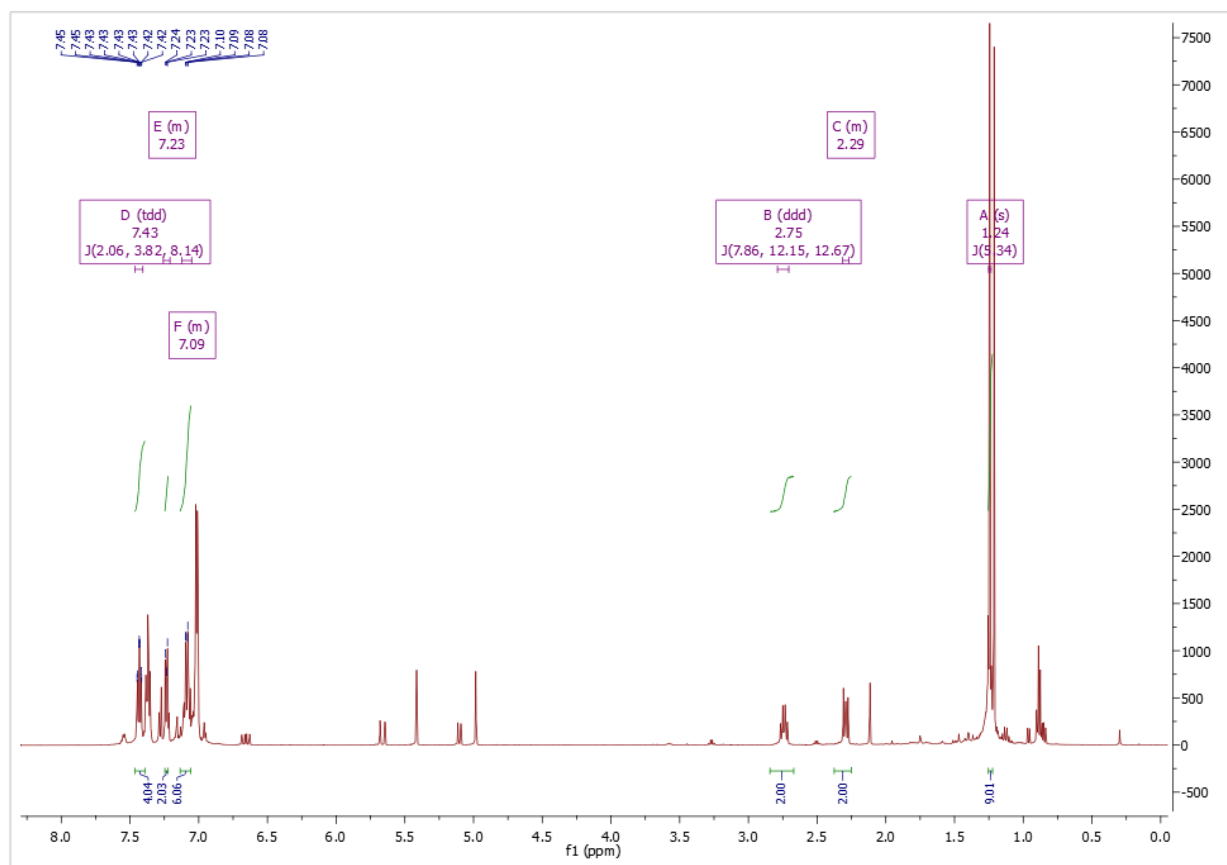

**Figure S7.**  $^1\text{H}$  NMR spectrum of the hydrophosphination of 4-*tert*-butylstyrene with  $\text{Ph}_2\text{PH}$  and **1** in  $\text{C}_6\text{D}_6$  after 2 hours under LED irradiation. Shifts corresponding to 2 missing protons on the product are obscured by starting material.

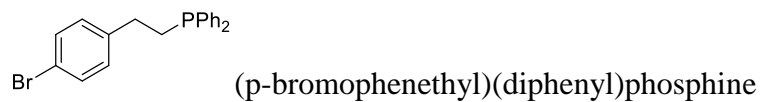

Spectra are consistent with literature [2]. After 2 hours under irradiation from an LED lamp the reaction goes to 91% consumption of 4-bromostyrene with **1** measured by  $^1\text{H}$  NMR spectroscopy.

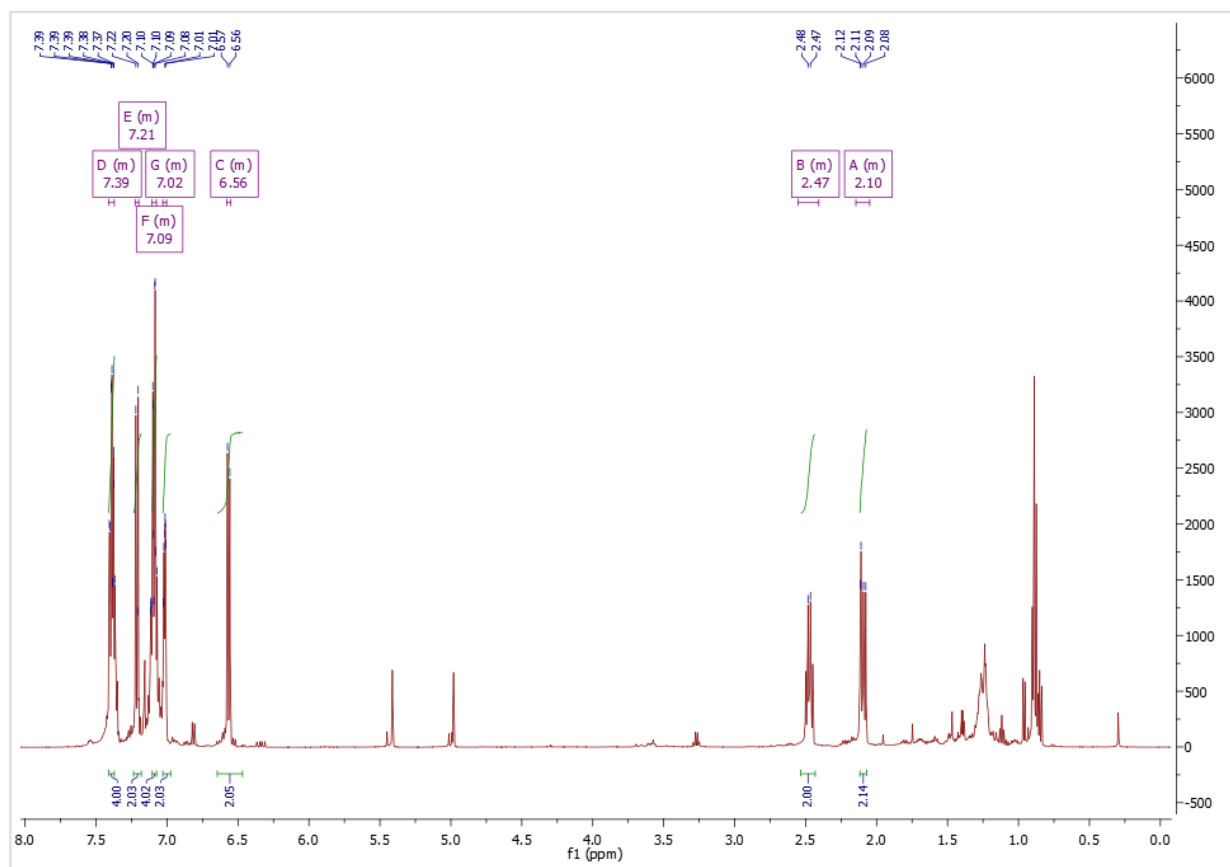

**Figure S8.**  $^1\text{H}$  NMR spectrum of the hydrophosphination of 4-bromostyrene with  $\text{Ph}_2\text{PH}$  and **1** in  $\text{C}_6\text{D}_6$  after 2 hours under LED irradiation.

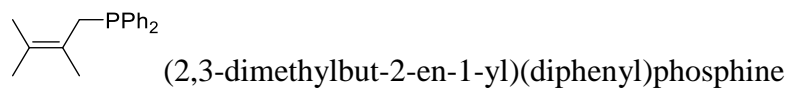

Spectra are consistent with literature [3]. After 2 hours under irradiation from an LED lamp the reaction goes to 65% consumption of 2,3-dimethylbutadiene with **1** measured by  $^1\text{H}$  NMR spectroscopy.

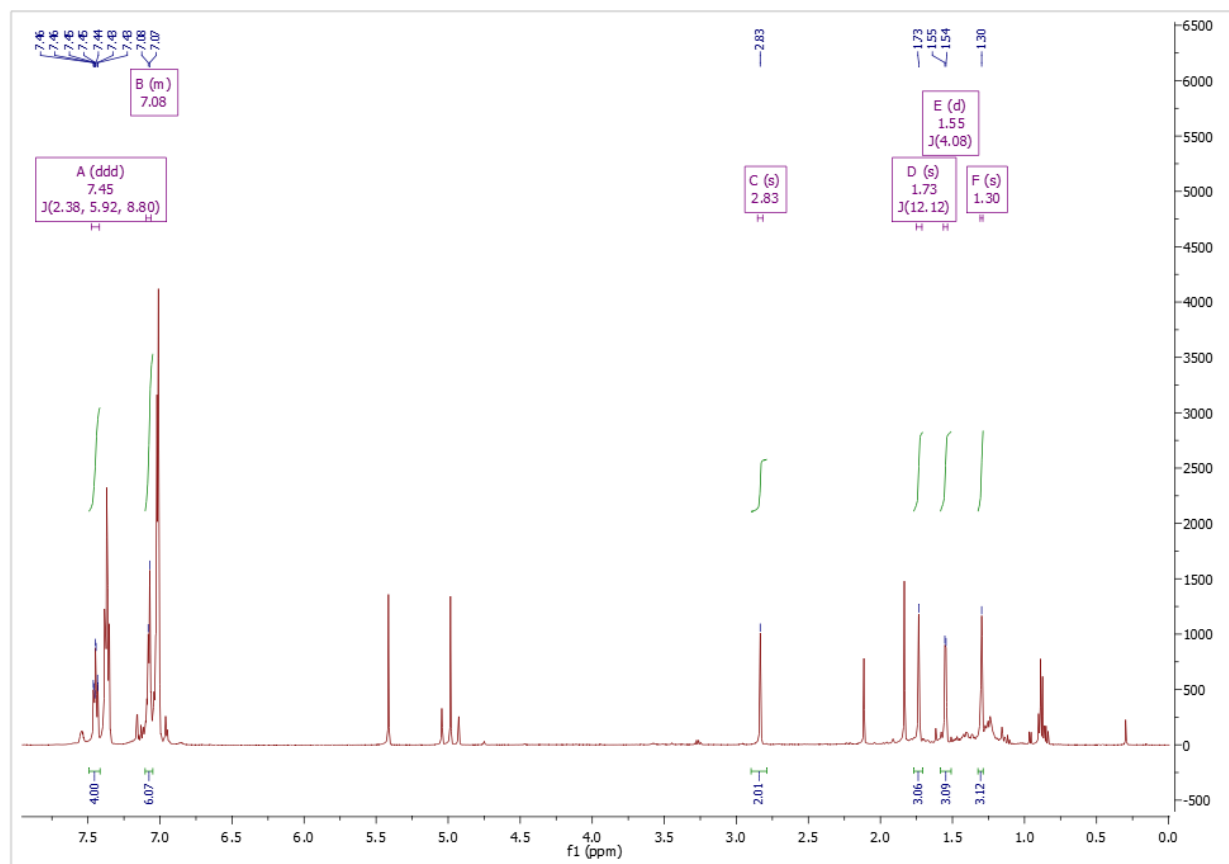

**Figure S9.**  $^1\text{H}$  NMR spectrum of the hydrophosphination of 2,3-dimethylbutadiene with  $\text{Ph}_2\text{PH}$  and **1** in  $\text{C}_6\text{D}_6$  after 2 hours under LED irradiation.

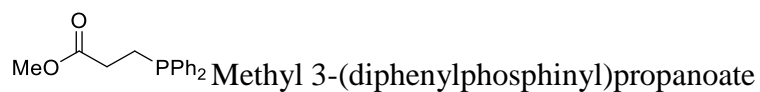

Spectra are consistent with literature [1]. After 2 hours under irradiation from an LED lamp the reaction goes to 90% consumption of methyl acrylate with **1** measured by  $^1\text{H}$  NMR spectroscopy.

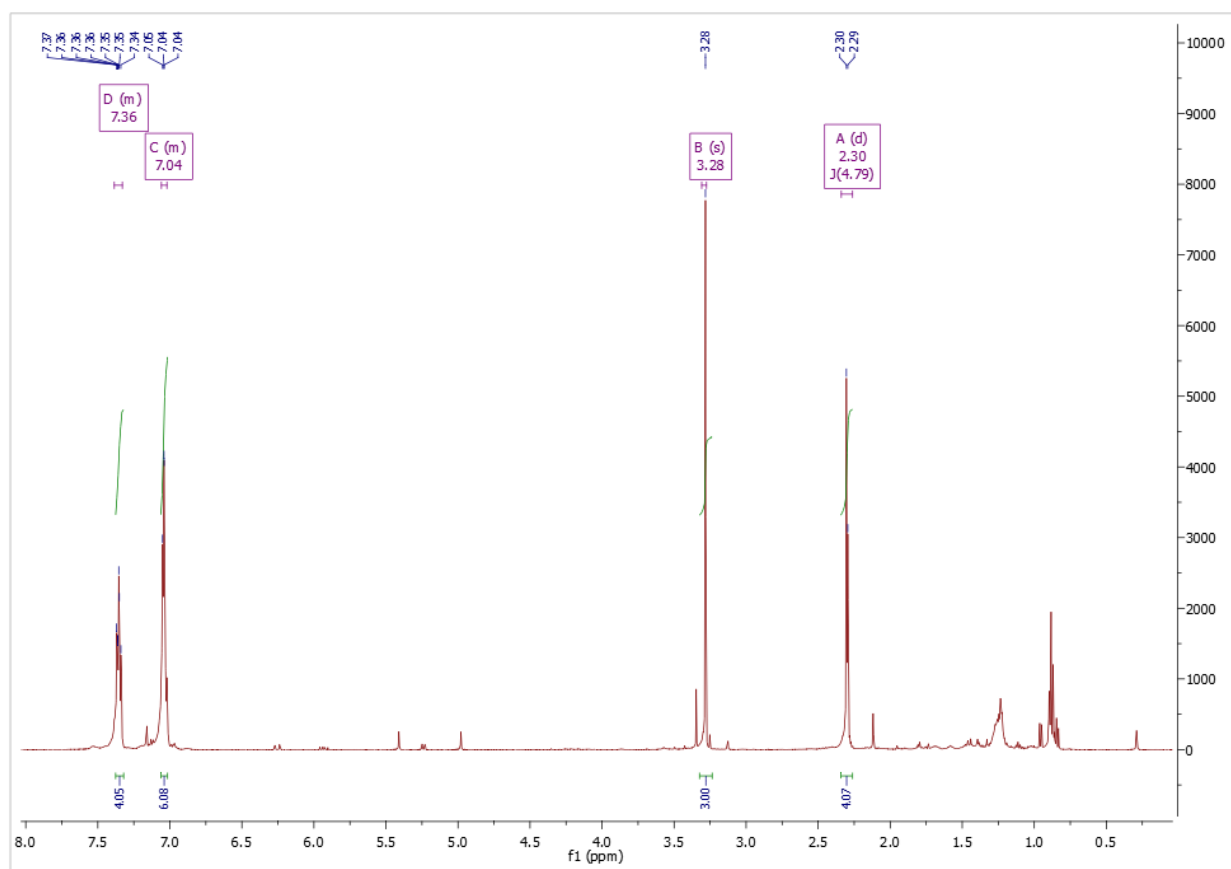

**Figure S10.**  $^1\text{H}$ NMR spectrum of the hydrophosphination of methyl acrylate with  $\text{Ph}_2\text{PH}$  and **1** in  $\text{C}_6\text{D}_6$  after 2 hours under LED irradiation.

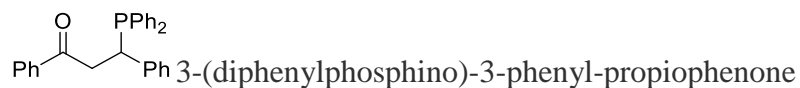

Spectra are consistent with literature [4]. After 24 hours under irradiation from an LED lamp the reaction goes to 68% consumption of *trans*-chalcone with **1** measured by  $^1\text{H}$  NMR spectroscopy.

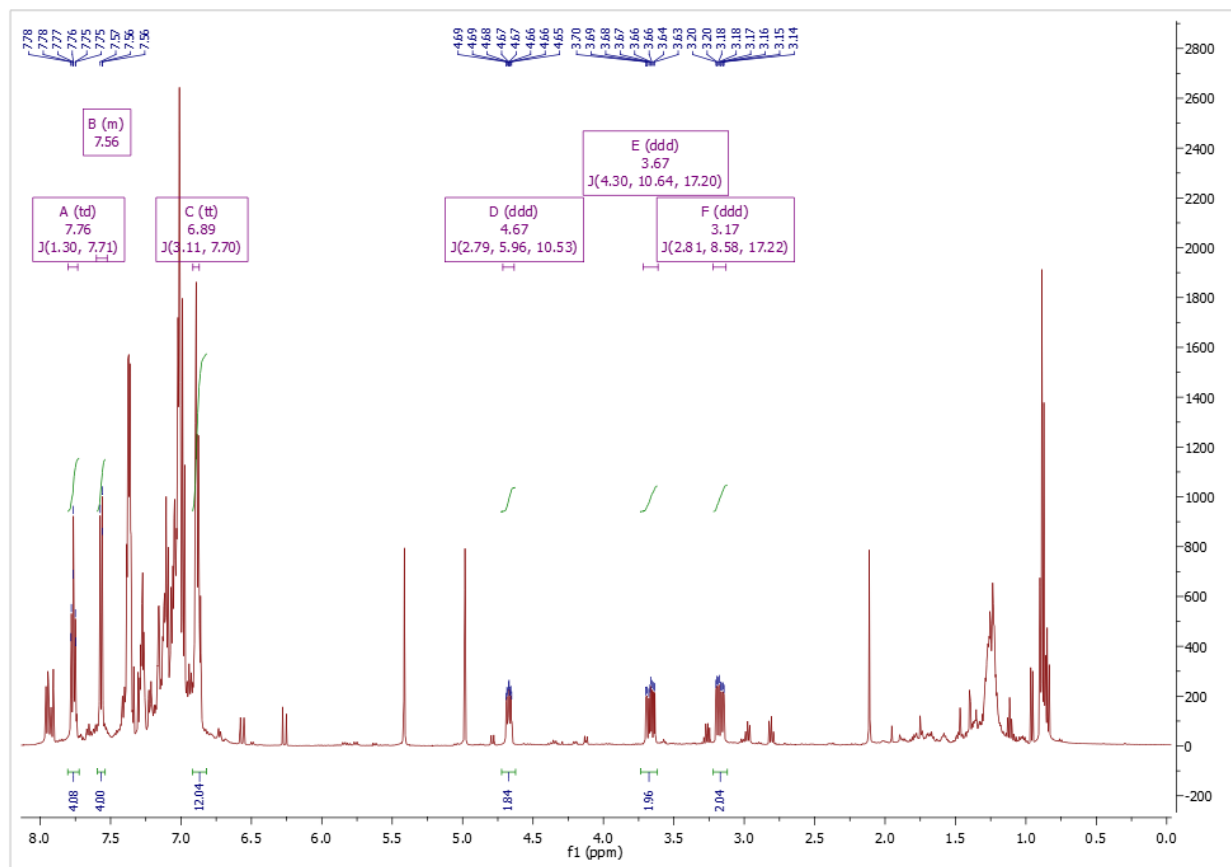

**Figure S11.**  $^1\text{H}$  NMR spectrum of the hydrophosphination of *trans*-chalcone with  $\text{Ph}_2\text{PH}$  and **1** in  $\text{C}_6\text{D}_6$  after 24 hours under LED irradiation.

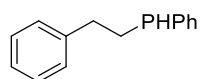

Phenethyl(phenyl)phosphine

Spectra are consistent with literature [5]. After 2 hours under irradiation from an LED lamp the reaction goes to quantitative consumption of styrene with **1** measured by  $^1\text{H}$  NMR spectroscopy.

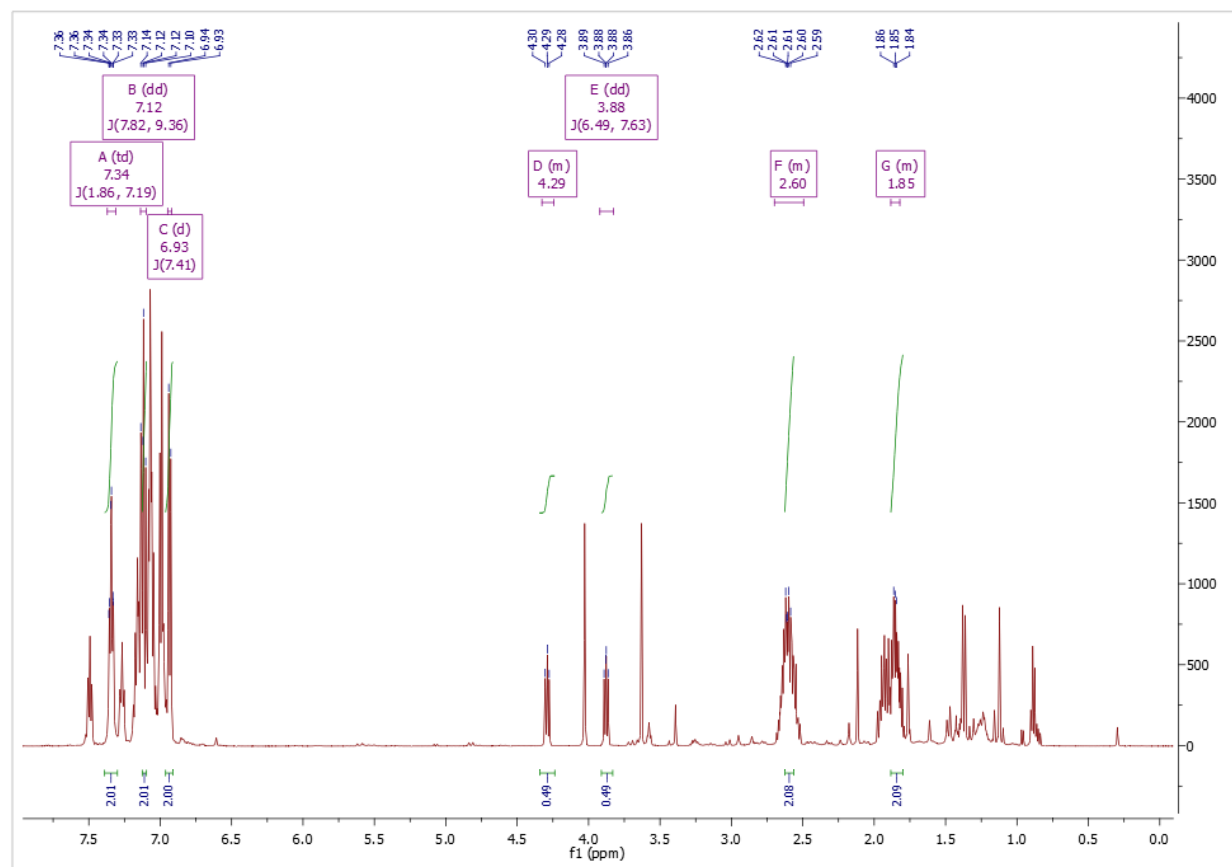

**Figure S12.**  $^1\text{H}$ NMR spectrum of the hydrophosphination of styrene with  $\text{PhPH}_2$  and **1** in  $\text{C}_6\text{D}_6$  after 2 hours under LED irradiation.

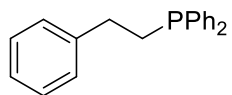

Phenethyl(diphenyl)phosphine

Spectra are consistent with literature [1]. After 2 hours under irradiation from an LED lamp the reaction goes to 91% consumption of styrene with **2** measured by  $^1\text{H}$  NMR spectroscopy.

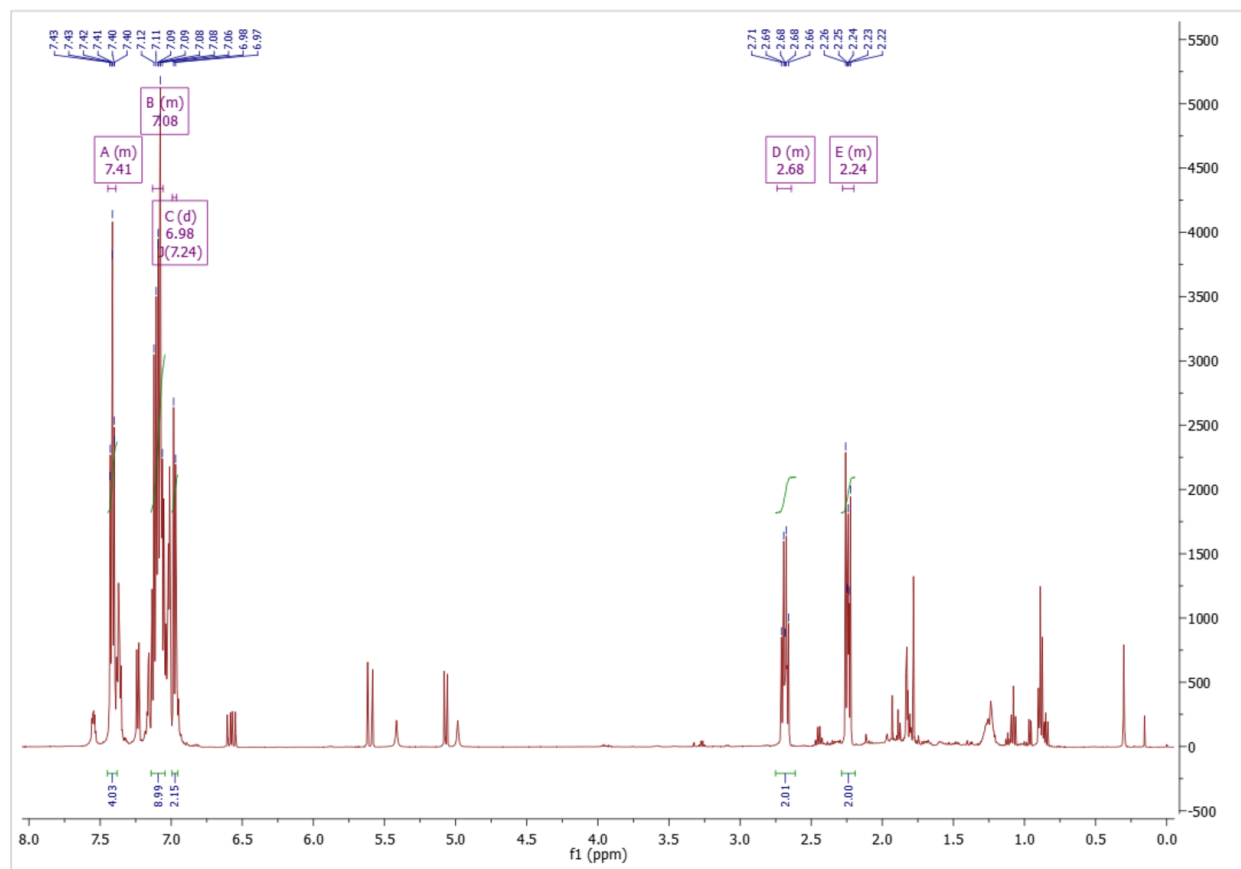

**Figure S13.**  $^1\text{H}$  NMR spectrum of the hydrophosphination of styrene with  $\text{Ph}_2\text{PH}$  and **2** in  $\text{C}_6\text{D}_6$  after 2 hours under LED irradiation.



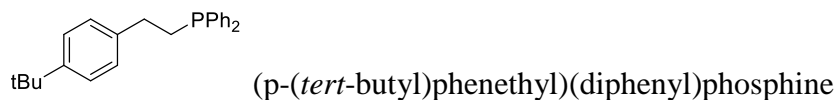

Spectra are consistent with literature [2]. After 2 hours under irradiation from an LED lamp the reaction goes to 88% consumption of 4-*tert*-butylstyrene with **2** measured by  $^1\text{H}$  NMR spectroscopy.

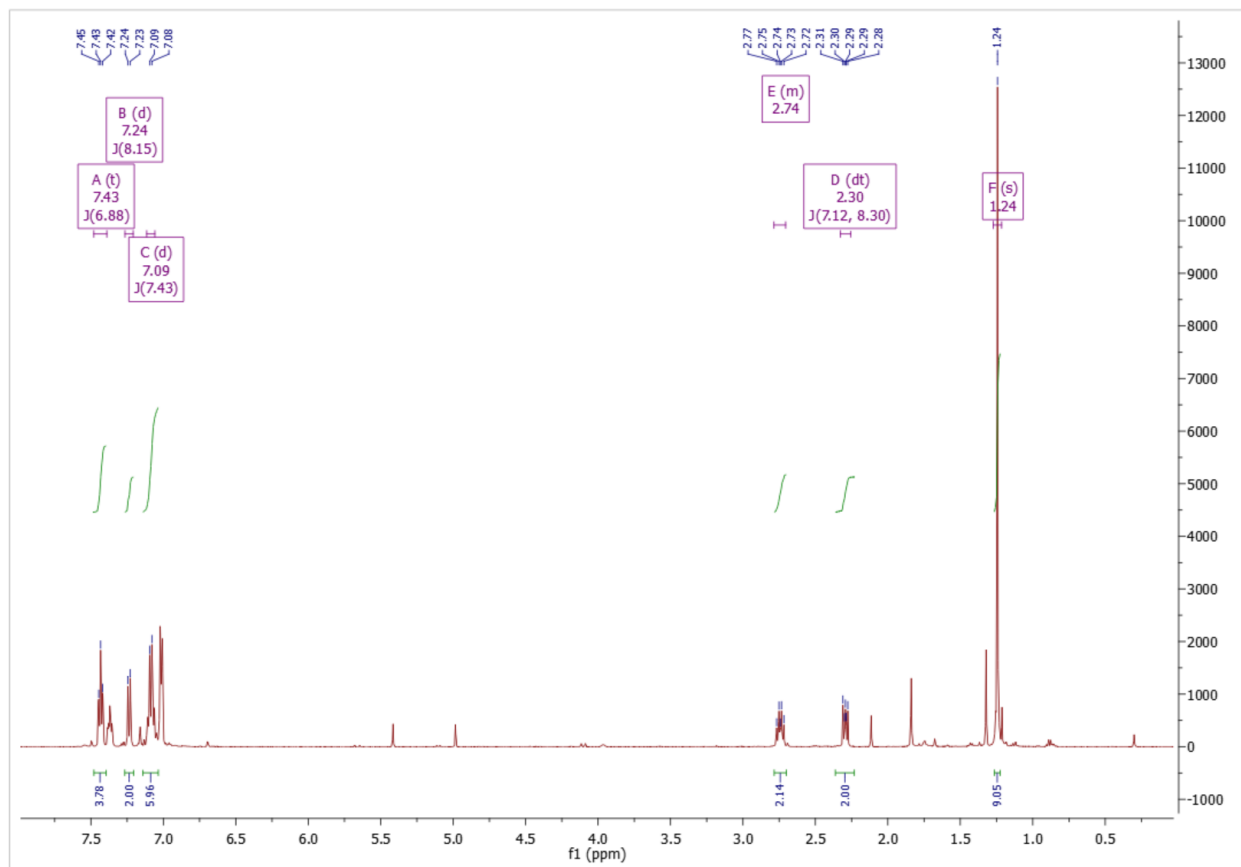

**Figure S14.**  $^1\text{H}$  NMR spectrum of the hydrophosphination of 4-*tert*-butylstyrene with  $\text{Ph}_2\text{PH}$  and **2** in  $\text{C}_6\text{D}_6$  after 2 hours under LED irradiation. Shifts corresponding to 2 missing protons on the product are obscured by starting material.

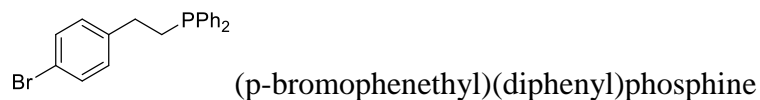

Spectra are consistent with literature [2]. After 2 hours under irradiation from an LED lamp the reaction goes to >99% consumption of 4-bromostyrene with **2** measured by  $^1\text{H}$  NMR spectroscopy.

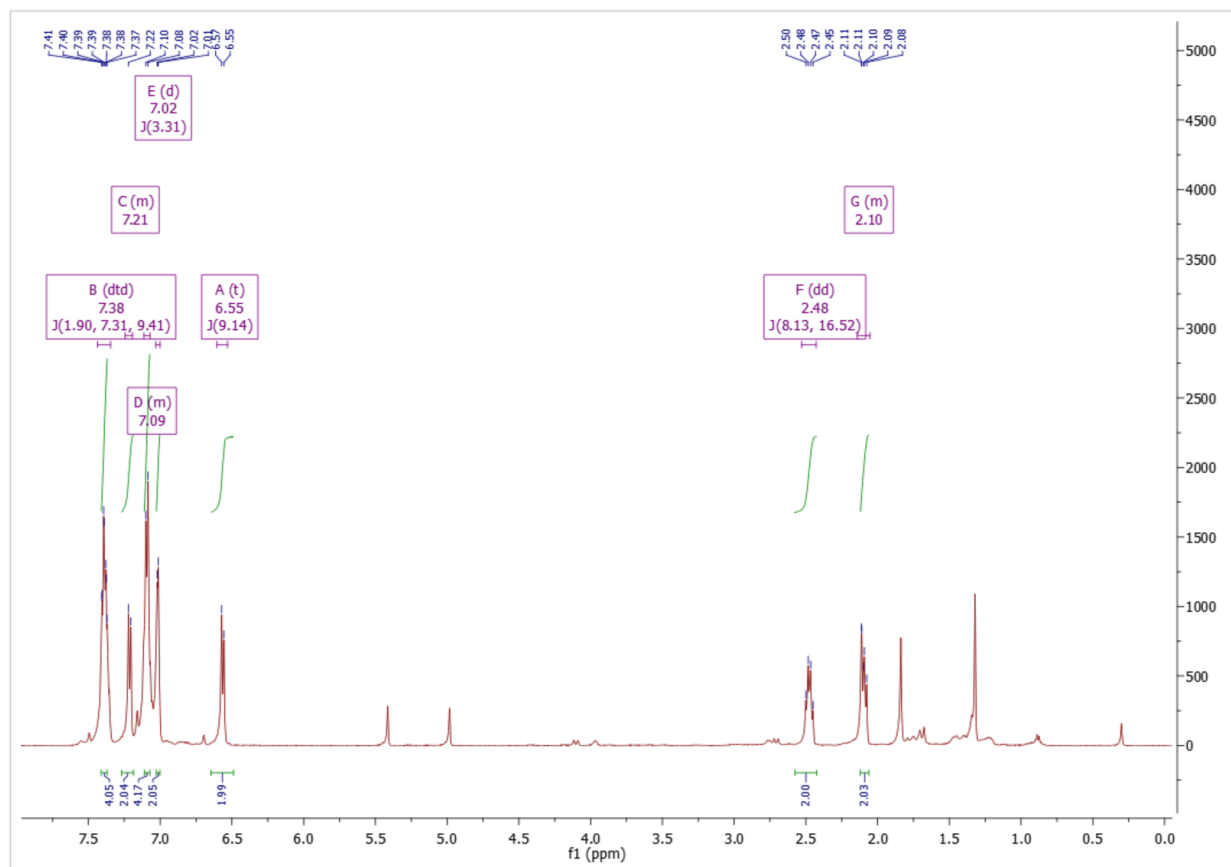

**Figure S15.**  $^1\text{H}$  NMR spectrum of the hydrophosphination of 4-bromostyrene with  $\text{Ph}_2\text{PH}$  and **2** in  $\text{C}_6\text{D}_6$  after 2 hours under LED irradiation.

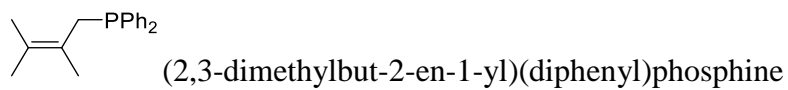

Spectra are consistent with literature [3]. After 2 hours under irradiation from an LED lamp the reaction goes to 66% consumption of 2,3-dimethylbutadiene with **2** measured by  $^1\text{H}$  NMR spectroscopy.

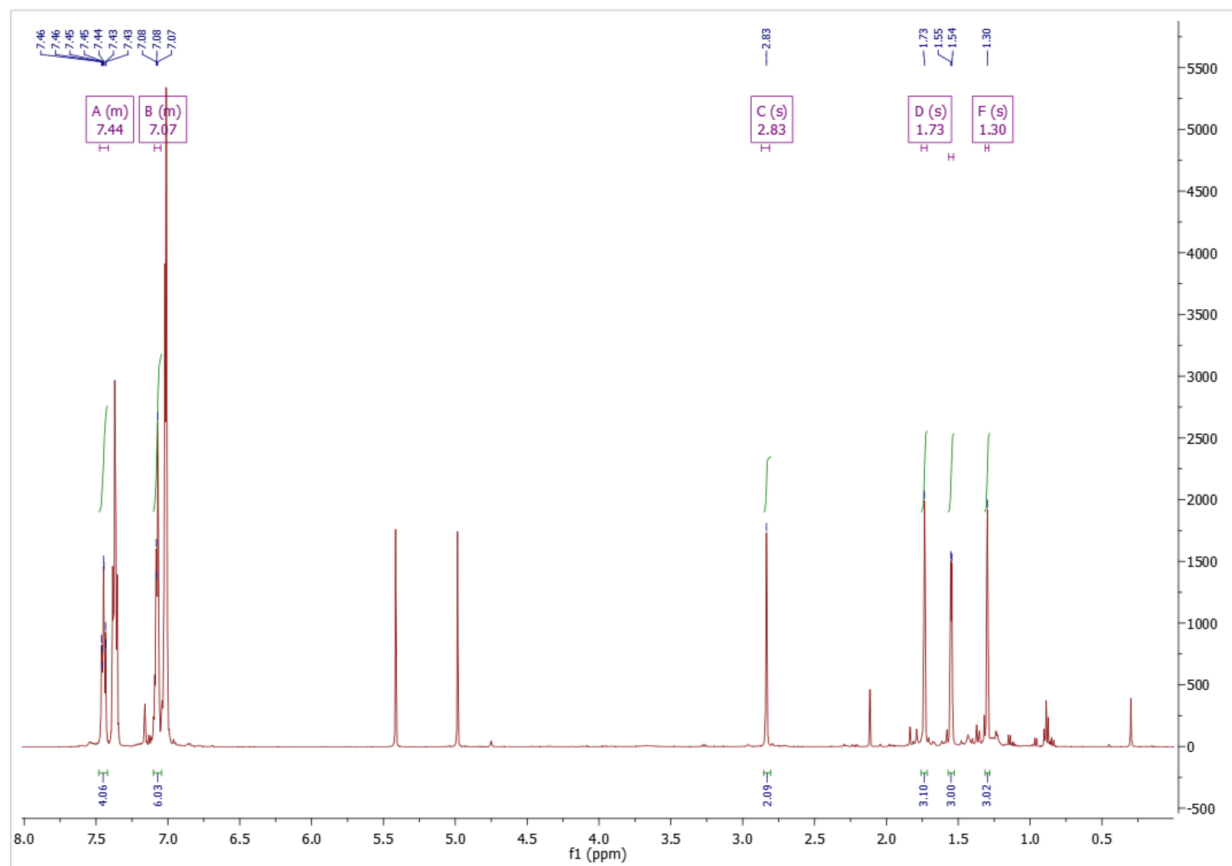

**Figure S16.**  $^1\text{H}$ NMR spectrum of the hydrophosphination of 2,3-dimethylbutadiene with  $\text{Ph}_2\text{PH}$  and **2** in  $\text{C}_6\text{D}_6$  after 2 hours under LED irradiation.

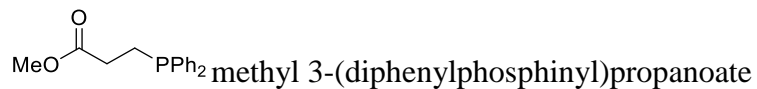

Spectra are consistent with literature [1]. After 2 hours under irradiation from an LED lamp the reaction goes to quantitative consumption of methyl acrylate with **2** measured by  $^1\text{H}$  NMR spectroscopy.

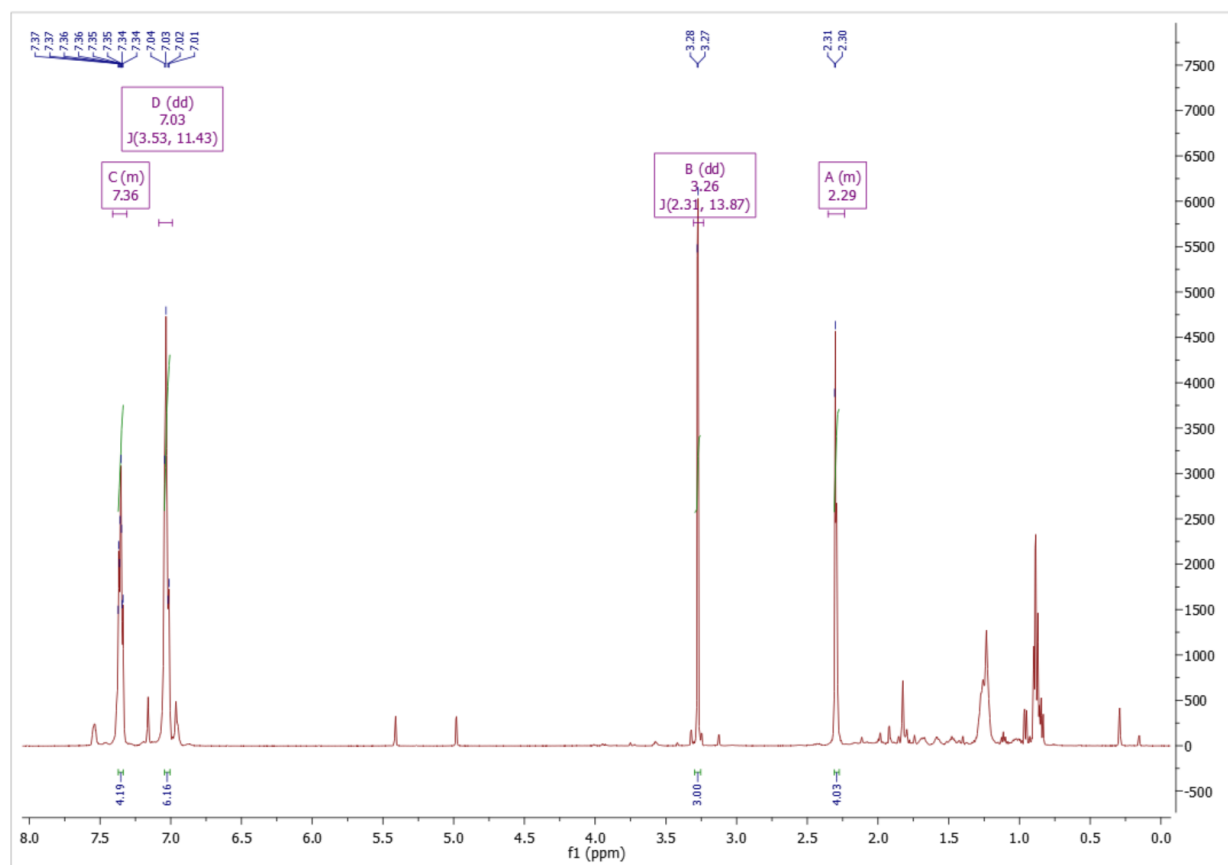

**Figure S17.**  $^1\text{H}$  NMR spectrum of the hydrophosphination of methyl acrylate with Ph<sub>2</sub>PH and **2** in C<sub>6</sub>D<sub>6</sub> after 2 hours under LED irradiation.

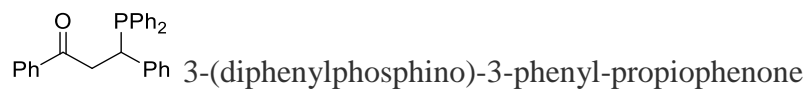

Spectra are consistent with literature [4]. After 24 hours under irradiation from an LED lamp the reaction goes to 68.1% consumption of *trans*-chalcone with **2** measured by  $^1\text{H}$  NMR spectroscopy.

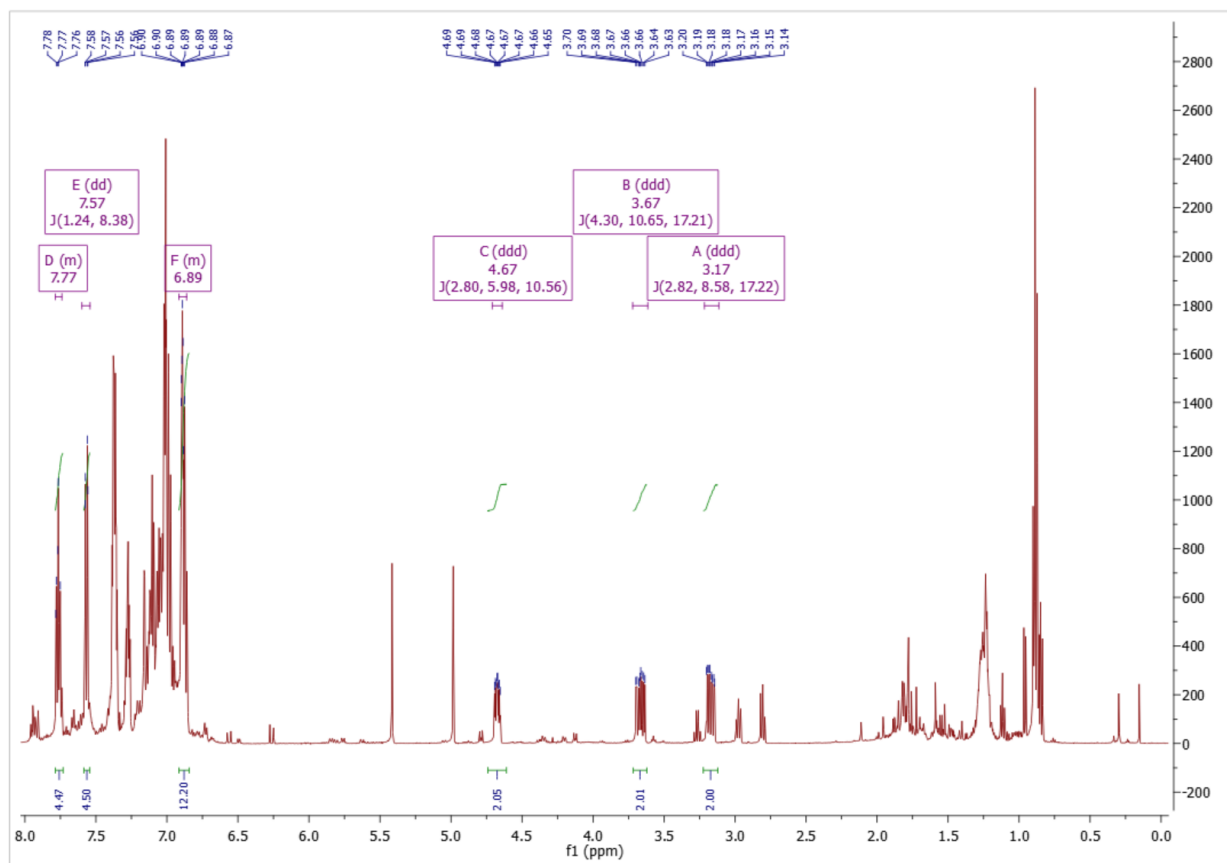

**Figure S18.**  $^1\text{H}$  NMR spectrum of the hydrophosphination of *trans*-chalcone with Ph<sub>2</sub>PH and **2** in C<sub>6</sub>D<sub>6</sub> after 24 hours under LED irradiation.



Phenethyl(phenyl)phosphine

Spectra are consistent with literature [5]. After 2 hours under irradiation from an LED lamp the reaction goes to quantitative consumption of styrene with **2** measured by  $^1\text{H}$  NMR spectroscopy.

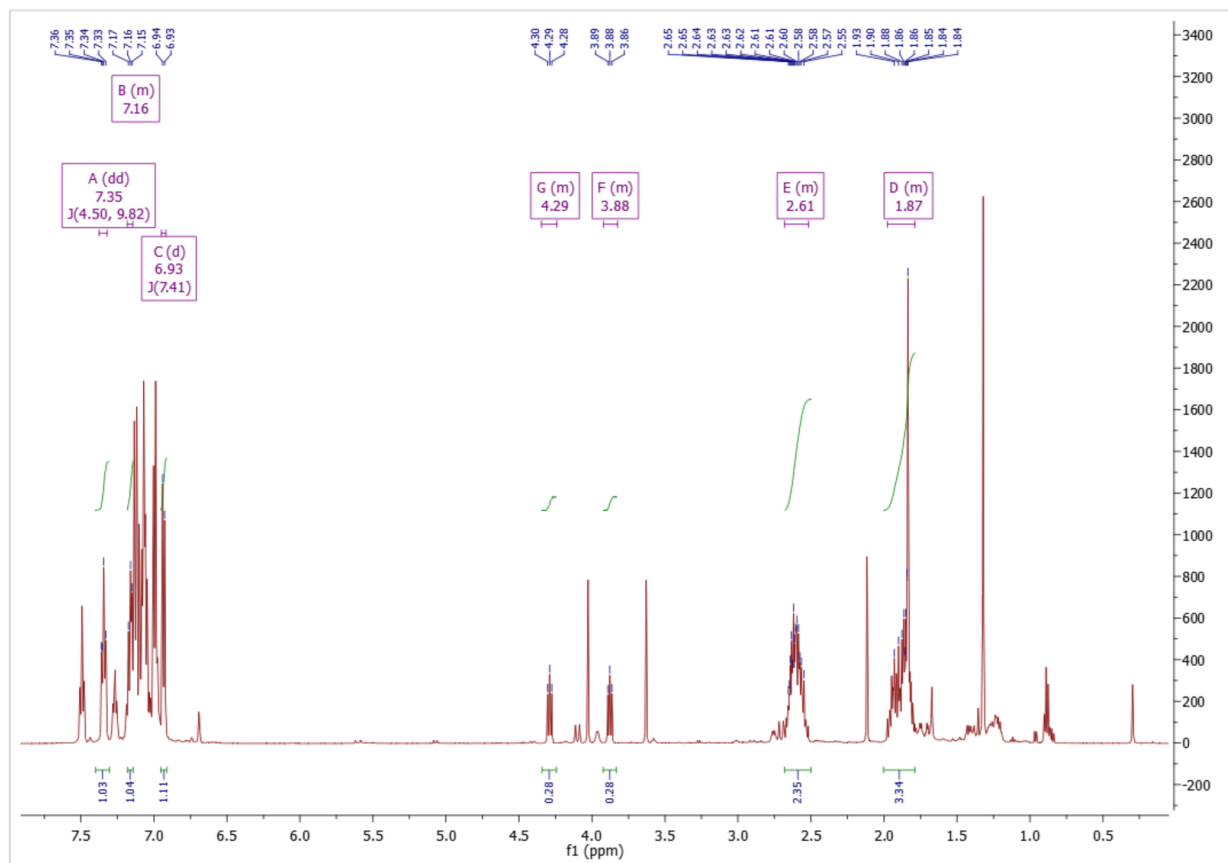

**Figure S19.**  $^1\text{H}$ NMR spectrum of the hydrophosphination of styrene with  $\text{PhPH}_2$  and **2** in  $\text{C}_6\text{D}_6$  after 2 hours under LED irradiation.

## References

1. Pagano, J.K.; Bange, C.A.; Farmiloe, S.E.; Waterman, R. Visible Light Photocatalysis Using a Commercially Available Iron Compound. *Organometallics* **2017**, *36*, 3891-3895, doi:10.1021/acs.organomet.7b00499.
2. Liu, Q.; Wang, C.; Zhang, X.; Xue, M.; Yao, Y.; Zhang, Y.; Shen, Q. Synthesis and molecular structures of divalent bridged bis(guanidinate) europium complexes and their application in intermolecular hydrophosphination of alkenes and alkynes. *New J. Chem.* **2016**, *40*, 10447-10454, doi:10.1039/C6NJ02508K.
3. Novas, B.T.; Bange, C.A.; Waterman, R. Photocatalytic Hydrophosphination of Alkenes and Alkynes Using Diphenylphosphine and Triamidoamine-Supported Zirconium. *Eur. J. Inorg. Chem.* **2019**, *2019*, 1640-1643, doi:10.1002/ejic.201801079.
4. Huang, Y.; Pullarkat, S.A.; Li, Y.; Leung, P.-H. Palladacycle-Catalyzed Asymmetric Hydrophosphination of Enones for Synthesis of C\*- and P\*-Chiral Tertiary Phosphines. *Inorg. Chem.* **2012**, *51*, 2533-2540, doi:10.1021/ic202472f.
5. Bange, C.A.; Conger, M.A.; Novas, B.T.; Young, E.R.; Liptak, M.D.; Waterman, R. Light-Driven, Zirconium-Catalyzed Hydrophosphination with Primary Phosphines. *ACS Catal.* **2018**, *8*, 6230-6238, doi:10.1021/acscatal.8b01002.
